# Supplementary material for: Estimation of Lifetime QALYs Based on Lifestyle Behaviors
Source: MDPI journal article supplement (doi:10.3390/ijerph18199970), 2021-09-22
Supplement: s1 [file s1]

**Table S1.** 95% CI for lifetime expected QALYs per capita in scenario analysis

| QALYs per person |               | Physical Activity |           |               |            |
|------------------|---------------|-------------------|-----------|---------------|------------|
|                  |               | Very often        | Usually   | Not so active | Too little |
| All              |               |                   |           |               |            |
| Sleeping         | Well          | 3.6-35.1          | 3.5-36.3  | 3.4-35.2      | 3.3-34.0   |
|                  | Lack of sleep | 3.4-34.9          | 3.3-33.8  | 3.2-32.8      | 3.1-31.6   |
| Age 10–19        |               |                   |           |               |            |
| Sleeping         | Well          | 25.1-40.0         | 24.4-39.0 | 23.7-37.8     | 22.9-36.5  |
|                  | Lack of sleep | 2.4-37.4          | 22.8-36.3 | 22.1-35.2     | 21.2-33.9  |
| Age 20–29        |               |                   |           |               |            |
| Sleeping         | Well          | 20.4-38.4         | 19.9-37.4 | 19.3-36.3     | 18.6-35.0  |
|                  | Lack of sleep | 19.1-35.9         | 18.5-34.8 | 18.0-33.7     | 17.3-32.5  |
| Age 30–39        |               |                   |           |               |            |
| Sleeping         | Well          | 16.2-35.9         | 15.8-35.0 | 15.3-34.0     | 14.8-32.8  |
|                  | Lack of sleep | 15.2-33.6         | 14.7-32.6 | 14.3-31.6     | 13.8-30.5  |
| Age 40–49        |               |                   |           |               |            |
| Sleeping         | Well          | 11.0-33.2         | 10.7-32.3 | 10.4-31.4     | 10.1-30.3  |
|                  | Lack of sleep | 10.3-31.1         | 10.0-30.2 | 9.7-29.2      | 9.3-28.1   |
| Age 50–59        |               |                   |           |               |            |
| Sleeping         | Well          | 5.5-29.5          | 5.4-28.7  | 5.2-27.8      | 5.0-26.9   |
|                  | Lack of sleep | 5.2-27.5          | 5.0-26.7  | 4.9-25.9      | 4.7-25.0   |
| Age 60–69        |               |                   |           |               |            |
| Sleeping         | Well          | 2.9-25.3          | 2.8-24.6  | 2.7-23.9      | 2.6-23.0   |
|                  | Lack of sleep | 2.7-23.6          | 2.6-22.9  | 2.5-22.2      | 2.4-21.4   |
| Age 70–79        |               |                   |           |               |            |
| Sleeping         | Well          | 1.9-20.5          | 1.8-19.9  | 1.8-19.3      | 1.7-18.6   |
|                  | Lack of sleep | 1.7-19.1          | 1.7-18.5  | 1.6-17.9      | 1.6-17.3   |
